# Supplementary material
Source: PubMed Central journal article supplement (PMC3182404)
Supplement: NIHMS322030-supplement-supplement_1.pdf [file NIHMS322030-supplement-supplement_1.pdf]

## Supplementary Table 1

|                          |                          |
|--------------------------|--------------------------|
| Primer1 s                | CAGGTATTATTCTCAGGGCTTTGG |
| Primer1 as               | TGGCAATGGTGTCTTTTCTTTG   |
| Probe 1                  | ACTGGCAAAGAGGATAT        |
| Primer2 s                | CACCTCACACGAGGCACAAG     |
| Primer2 as               | ATGTTTGCGCGTCCTGATC      |
| Probe 2                  | CACCCAGCACCAGC           |
| Primer3 s                | GGATTAAGGGCACACGTGTTG    |
| Primer3 as               | TTTCCCCACTCTGTCTTTCCA    |
| Probe 3                  | TGGCCAATGTTTATT          |
| Primer4 s                | TCATCGGCTCCCACACAGA      |
| Primer4 as               | GGCAGTACCGAAGCTGTTTCA    |
| Probe 4                  | CATGCCGCACTCAA           |
| Primer5 s                | CCCACAAAGCAAACTCTTGTC    |
| Primer5 as               | ACTGCATGACCCGAAAGCA      |
| Probe 5                  | TGCTCTGCGTGTGGGT         |
| Primer6 s                | GCATCGCATCTTTCAAACCA     |
| Primer6 as               | TTAGGATAAGCGCCCAGTGAAT   |
| Probe 6                  | TGGGACCAGGGCGT           |
| Primer s for NcoR2 CHIP  | CAGACTCCAAGCACATCATG     |
| Primer as for NcoR2 CHIP | GACTGACCTACATTGTGGGC     |

Sequences of primers used in chromatin immunoprecipitation assay spanning across the *il17a-f* locus

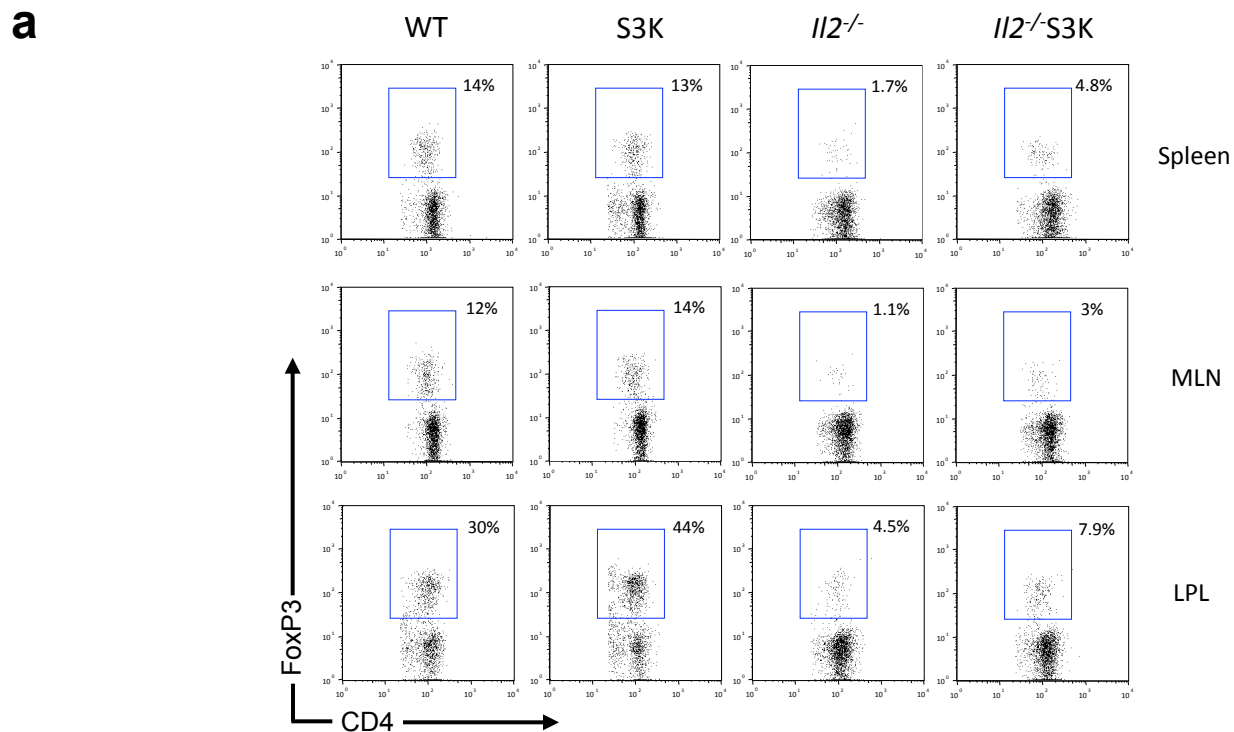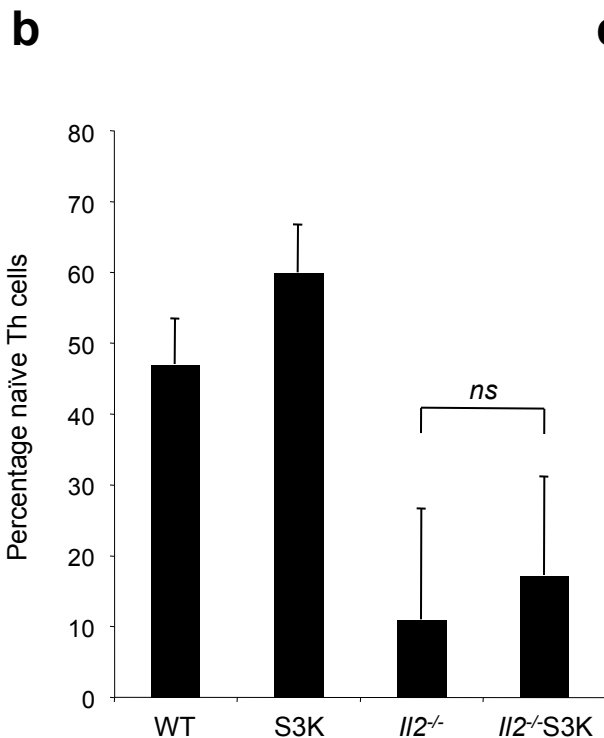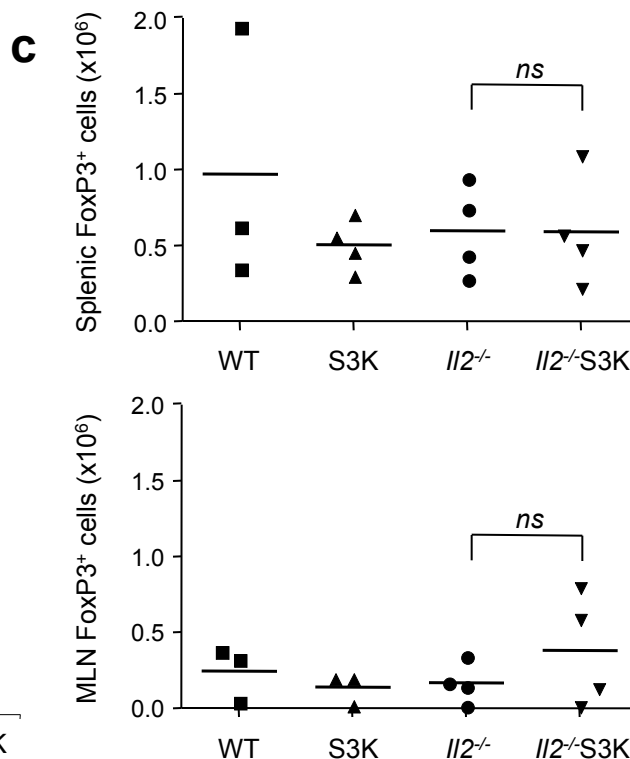

**Absence of *Stat3* in T cells does not rescue the Treg deficiency associated with IL-2 deficiency.**

(a) CD4<sup>+</sup> T cells were isolated from spleen, mesenteric lymph nodes (MLN) and colonic lamina propria (LPL) of *Stat3*<sup>fl/fl</sup> (WT), *CD4-Cre;Stat3*<sup>fl/fl</sup> (S3K), *Il2*<sup>-/-</sup>, *CD4-Cre;Stat3*<sup>fl/fl</sup>;*Il2*<sup>-/-</sup> (*Il2*<sup>-/-</sup>S3K) mice aged for three months. FOXP3 expression was determined by intracellular staining. Flow cytometry dot plots from a single representative experiment are shown. (b) Reduction in proportions of naïve (CD4<sup>+</sup>CD62L<sup>+</sup>CD44<sup>-</sup>) T cells in *Il2*<sup>-/-</sup>S3K mice. Naïve CD4<sup>+</sup> T cells from spleens from WT, S3K, *Il2*<sup>-/-</sup>, and *Il2*<sup>-/-</sup>S3K mice were determined by flow cytometry. Data are representative of three experiments. (c) Absolute numbers of FOXP3<sup>+</sup> CD4<sup>+</sup> T cells in the spleen and MLN in millions of cells. Statistical analysis represents paired t tests (*ns* - not significant).

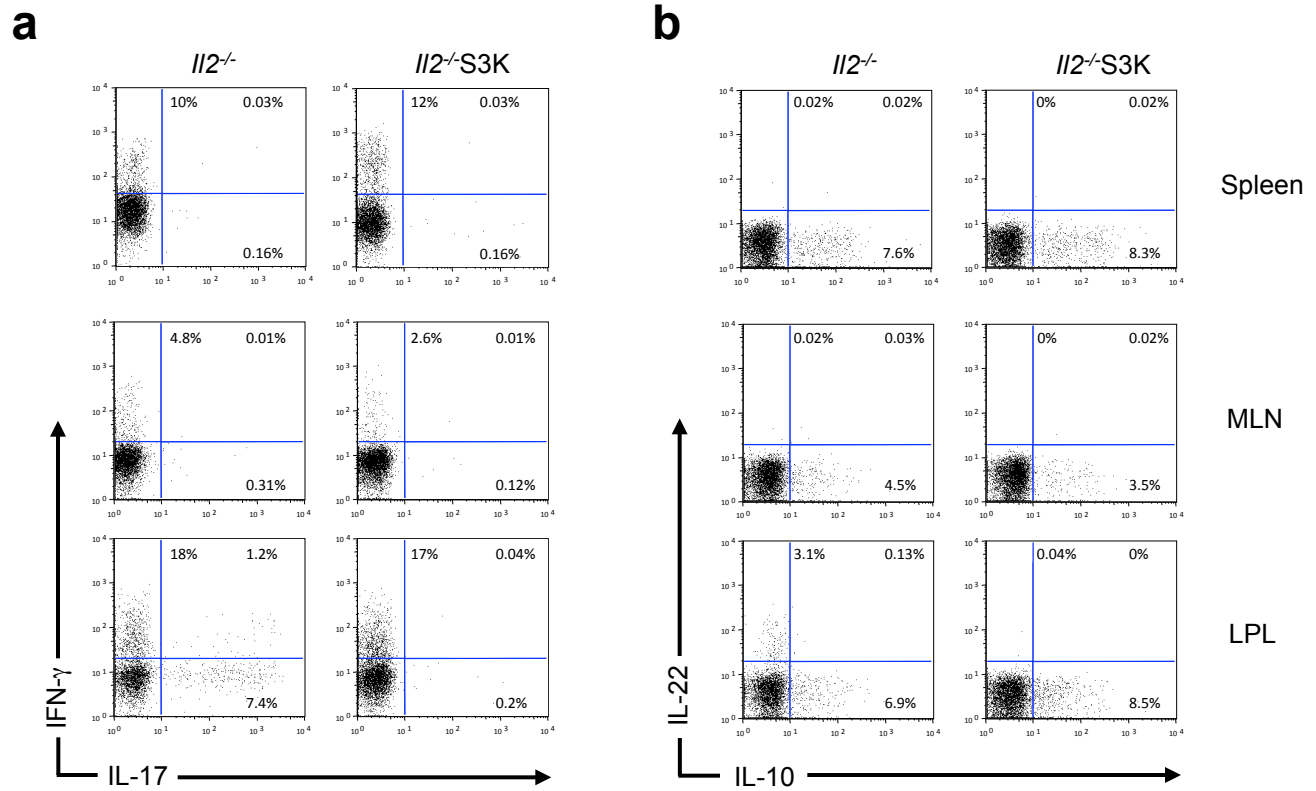

**c**

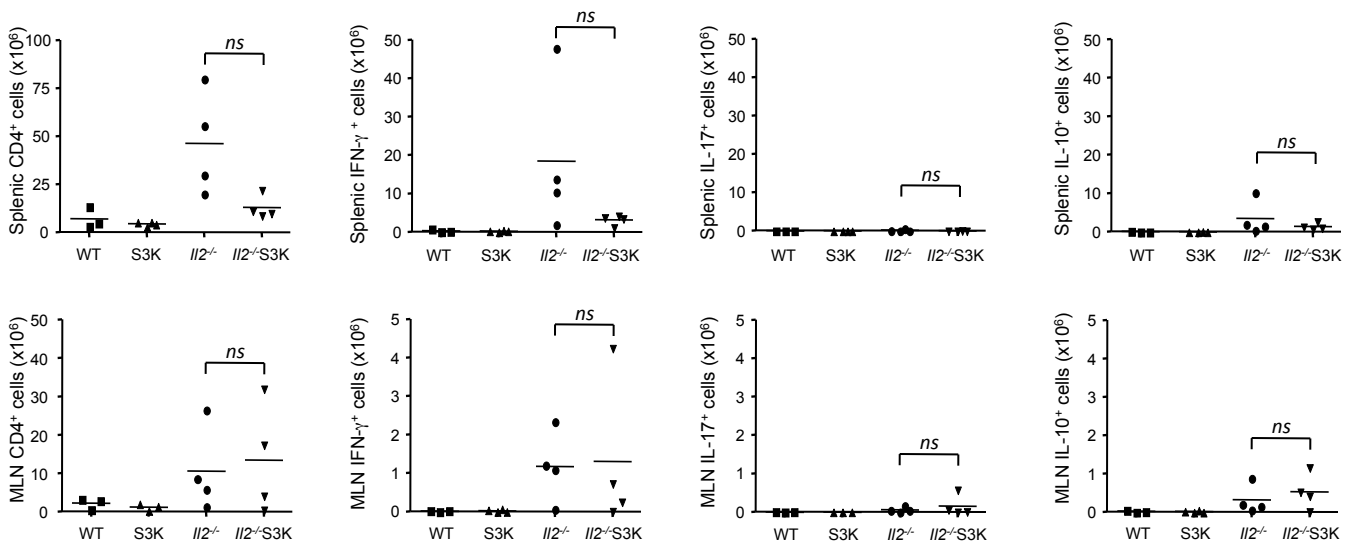

### Deletion of *Stat3* abrogates IL-17 and IL-22 production in LPL cells.

CD4<sup>+</sup> T cells were isolated from spleen, mesenteric lymph nodes (MLN) and colonic lamina propria (LPL) of *Stat3*<sup>fl/fl</sup>; *I12*<sup>-/-</sup> (*I12*<sup>-/-</sup>) and *CD4*-*Cre*; *Stat3*<sup>fl/fl</sup>; *I12*<sup>-/-</sup> (*I12*<sup>-/-</sup>S3K) mice aged three months. IFN- $\gamma$  and IL-17 expression (a) or IL-22 and IL-10 expression (b) were determined by intracellular staining, flow cytometry dot plots from a single representative experiment are shown. (c) Total numbers of CD4<sup>+</sup> cells, CD4<sup>+</sup>IFN- $\gamma$ <sup>+</sup> cells, CD4<sup>+</sup>IL-17<sup>+</sup> cells and CD4<sup>+</sup>IL-10<sup>+</sup> cells from spleen and MLN from *Stat3*<sup>fl/fl</sup> (WT), *CD4*-*Cre*; *Stat3*<sup>fl/fl</sup> (S3K), *I12*<sup>-/-</sup> and *I12*<sup>-/-</sup>S3K mice are illustrated. Statistical analysis represents paired t tests (*ns* - not significant).

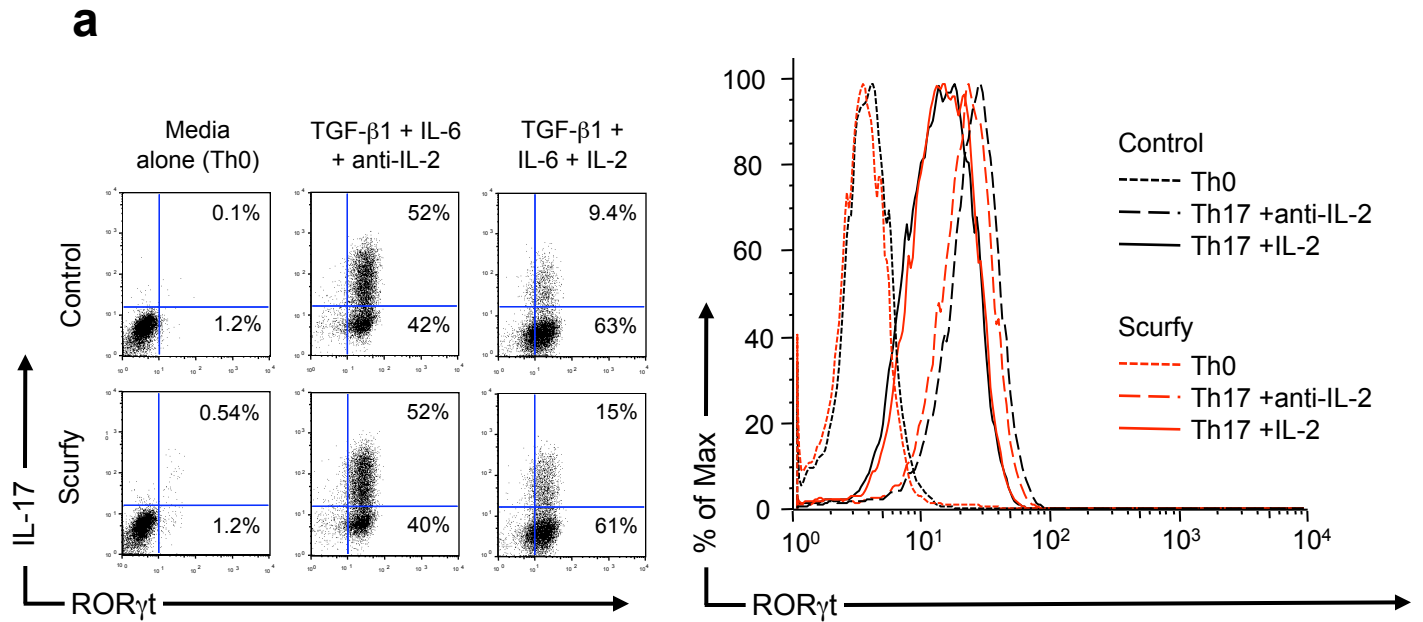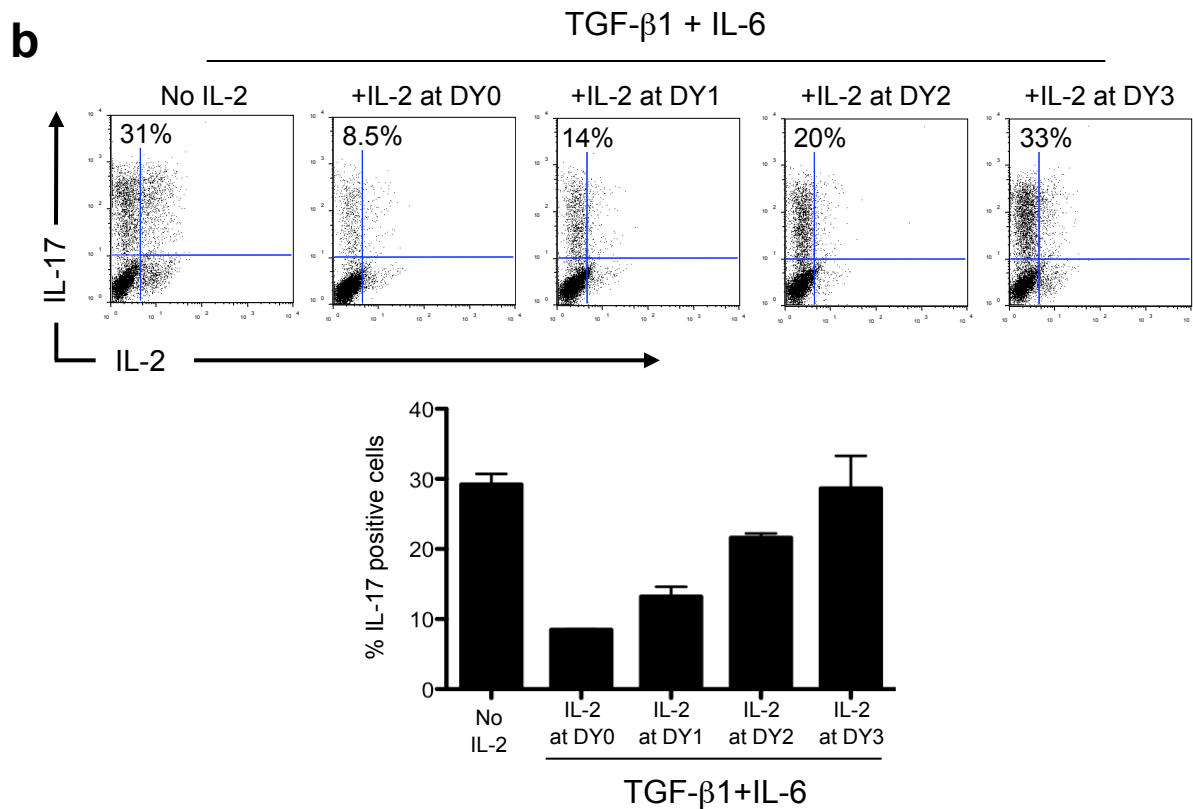

**Effect of IL-2 on ROR $\gamma$ t expression is unaffected by the presence or absence of FoxP3.**

(a) CD4<sup>+</sup> T cells from *Rag1*<sup>-/-</sup>;OT2 and *Foxp3*<sup>sf</sup>; *Rag1*<sup>-/-</sup>;OT2 were stimulated in media alone (Th0) or with TGF- $\beta$ 1 and IL-6 (Th17) with anti-mIL-2 and hIL-2. ROR $\gamma$ t expression was determined by ICS. (b) Naïve CD4<sup>+</sup> T cells were stimulated in the presence of TGF- $\beta$ 1 and IL-6 for 4 days with different IL-2 incubation time before harvesting. IL-17A-producing cells were detected by ICS. Data are representative of two independent experiments.

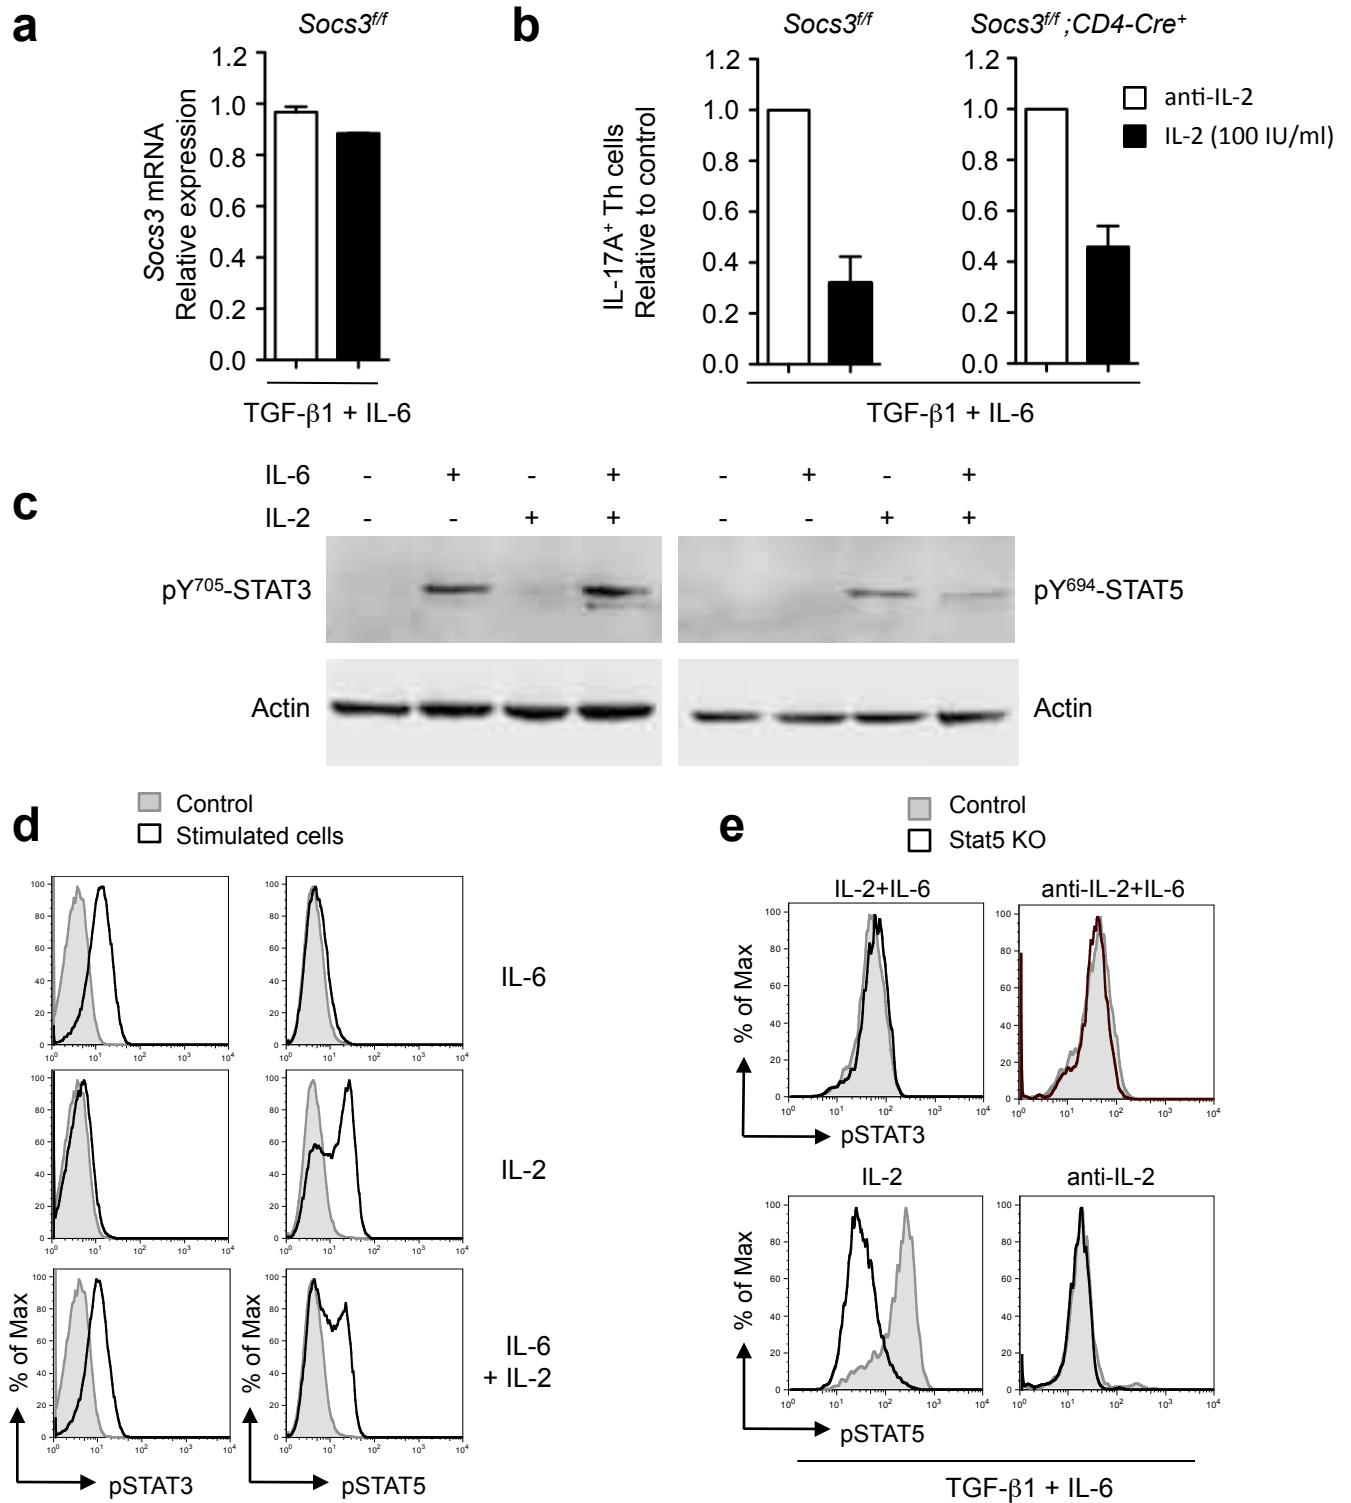

**Socs3 does not mediate the inhibitory effect of IL-2 on IL-17A production.**

Naïve CD4<sup>+</sup> T cells from C57BL/6 mice were cultured in the presence of TGF- $\beta$ 1, IL-6, anti-IFN- $\gamma$ , anti-IL-4 with the addition of anti-mIL-2 or hIL-2 for 3 days and *Socs3* mRNA were determined by real-time PCR (a). Naïve CD4<sup>+</sup> T cells from *Socs3<sup>fl/fl</sup>* and *CD4-Cre;Socs3<sup>fl/fl</sup>* were cultured in the presence of TGF- $\beta$ 1, IL-6, anti-IFN- $\gamma$ , anti-IL-4 with addition of anti-mIL-2 or hIL-2 (100 IU/ml) for 3 days and IL-17A expression was determined by ICS; histograms represent data from three independent experiments (b). CD4<sup>+</sup> T lymphoblasts from C57BL/6 mice were washed and cultured with serum-free medium for 2 hours followed stimulation with IL-6, IL-2 or IL-2 followed by IL-6. Phosphorylation of STAT3 and STAT5 was determined by immunoblotting (c) and phospho-flow cytometry (d). Naïve CD4<sup>+</sup> T cells isolated from *Stat5<sup>fl/fl</sup>* and *CD4-Cre;Stat5<sup>fl/fl</sup>* were antigen receptor stimulated in the presence of TGF- $\beta$ 1, IL-6, anti-IFN- $\gamma$ , anti-IL-4 for 3 days. Cells were washed and cultured with serum-free medium for 2 hours. Subsequently, cells were treated with IL-6 together with either hIL-2 (100 IU/ml) or anti-mIL-2 and analysed for phospho-STAT3 (upper panels) or simply hIL-2 or anti-IL-2 alone and analysed for phospho-STAT5 (lower panels). Phosphorylation of STAT3 and STAT5 was determined by flow cytometry after 30 minutes (e).

Supplementary Figure 4
